# Supplementary material
Source: PubMed Central journal article supplement (PMC5462024)
Supplement: supp_pp.17.00070_PP2017-00070R2_Supplemental_Tables.pdf [file supp_pp.17.00070_PP2017-00070R2_Supplemental_Tables.pdf]

**Table S1** Metabolic enzyme and transporter genes involved in nicotine and related metabolism in tobacco. Metabolic enzymes are abbreviated as in **Figure 1**. Same SSs appearing multiple times are indicated with numbered asterisks in brackets. A phylogenetic tree for BBLs supporting the gene naming is shown in **Supplemental Figure S3**. NA; not available, chr.; chromosome, SS; super scaffold. T; *N. tomentosiformis*, S; *N. sylvestris*, MATE; multidrug and toxic compound extrusion

| protein | gene           | gene no. | origin | chr. no. | no.      | Super Scaffold (SS)    |                      | orientation |
|---------|----------------|----------|--------|----------|----------|------------------------|----------------------|-------------|
|         |                |          |        |          |          | start position on chr. | end position on chr. |             |
| ODC     | <i>ODC1</i>    | 53859    | T      | 4        | 3473     | NA                     | NA                   | NA          |
|         | <i>ODC2.1</i>  | 59117    | S      | NA       | 4493     | NA                     | NA                   | NA          |
|         | <i>ODC2.2</i>  | 36820    | T      | 12       | 17585    | 3053449                | 3401286              | +           |
| PMT     | <i>PMT1</i>    | 51171    | S      | 5        | 293      | NA                     | NA                   | NA          |
|         | <i>PMT2</i>    | 11501    | S      | 5        | 12228    | NA                     | NA                   | NA          |
|         | <i>PMT3</i>    | 64369    | T      | 15       | 5496     | 24558026               | 25158092             | +           |
| SPDS    | <i>SPDS1.1</i> | 85439    | S      | 13       | 9517     | 65137943               | 66066006             | -           |
|         | <i>SPDS1.2</i> | 66703    | T      | 4        | 5927     | 8070558                | 8503316              | -           |
|         | <i>SPDS2.1</i> | 31582    | S      | 20       | 16761    | 11140291               | 11479445             | +           |
|         | <i>SPDS2.2</i> | 38827    | T      | 24       | 18021    | 73714954               | 74588983             | -           |
|         | <i>SPDS3.1</i> | 55613    | S      | 16       | 3829     | 43241401               | 44313357             | -           |
|         | <i>SPDS3.2</i> | 7022     | T      | 12       | 11406    | NA                     | NA                   | NA          |
| MPO     | <i>MPO1.1</i>  | 67187    | S      | NA       | 6051     | NA                     | NA                   | NA          |
|         | <i>MPO1.2</i>  | 3417     | T      | 24       | 10683    | NA                     | NA                   | NA          |
| DAO     | <i>DAO1.1</i>  | 62765    | S      | 8        | 517      | 73159306               | 74639532             | +           |
|         | <i>DAO1.2</i>  | 7666     | T      | 22       | 11487    | 41494549               | 42231281             | -           |
|         | <i>DAO2.1</i>  | 75226    | S      | 20       | 7543     | 16088260               | 17549898             | -           |
|         | <i>DAO2.2</i>  | 24485    | T      | 24       | 1540     | 69072361               | 69815524             | -           |
| AO      | <i>AO1</i>     | 57190    | T      | 21       | 4133     | 51719172               | 52188197             | +           |
|         | <i>AO2.1</i>   | 19078    | S      | 7        | 147079   | NA                     | NA                   | NA          |
|         | <i>AO2.2</i>   | 71591    | T      | 21       | 6835     | NA                     | NA                   | NA          |
| QS      | <i>QS1.1</i>   | 54977    | S      | 6        | 371      | 79139200               | 79805586             | +           |
|         | <i>QS1.2</i>   | 27785    | T      | 4        | 1625     | 72847380               | 73170704             | -           |
| QPT     | <i>QPT1.1</i>  | 26947    | S      | NA       | 160281   | NA                     | NA                   | NA          |
|         | <i>QPT1.2</i>  | 18160-2  | T      | NA       | 1382(*1) | NA                     | NA                   | NA          |
|         | <i>QPT2.1</i>  | 74444    | S      | NA       | 74055    | NA                     | NA                   | NA          |
|         | <i>QPT2.2</i>  | 18160    | T      | NA       | 1382(*1) | NA                     | NA                   | NA          |
| A622    | <i>A622</i>    | 75882    | S      | NA       | 7679     | NA                     | NA                   | NA          |
|         | <i>A622L</i>   | 75125    | T      | 12       | 753(*2)  | 57347634               | 58008935             | -           |
| BBL     | <i>BBLa</i>    | 36833    | S      | 22       | 17588    | 73071000               | 73701890             | +           |
|         | <i>BBLb</i>    | 44985    | T      | 19       | 2106     | NA                     | NA                   | NA          |
|         | <i>BBLc</i>    | 72778    | S      | NA       | 7078     | NA                     | NA                   | NA          |
|         | <i>BBLd.2</i>  | 75618    | T      | NA       | 7622     | NA                     | NA                   | NA          |
|         | <i>BBLe</i>    | 8212     | T      | 19       | 11571    | NA                     | NA                   | NA          |
| MATE    | <i>MATE1</i>   | 13706    | S      | 16       | 12706    | 45652827               | 45980361             | +           |
|         | <i>MATE2</i>   | 75126    | T      | 12       | 753(*2)  | 57347634               | 58008935             | -           |
| NUP     | <i>NUP 1</i>   | 690      | T      | 24       | 10130    | NA                     | NA                   | NA          |
|         | <i>NUP2</i>    | 81472    | S      | 16       | 8708     | NA                     | NA                   | NA          |



**Table S2** Primer sequences for qRT-PCR analysis. These primers were used for the experiments shown in **Figure 2** and **Supplemental Figure S6**.

| gene                 | direction | sequence                     |
|----------------------|-----------|------------------------------|
| <i>ODC1</i>          | F         | AATCTTGTCAAATATGTGAGTC       |
|                      | R         | ATGTTATAAAACACTATCAG         |
| <i>ODC2</i>          | F         | ATCGTAGTAACGTTACCTGCG        |
|                      | R         | AACCTGCAGCTCCGGTAACTG        |
| <i>SPDS2</i>         | F         | AGGAGGMGATGGTGGTGTCTTGCG     |
|                      | R         | AGMAACMTCAAYTACCATCTTG       |
| <i>PMT</i>           | F         | GAGGAATTGGTTTTACATTATTCG     |
|                      | R         | CTRGATACATCAACTACCACGTC      |
| <i>DAO1</i>          | F         | ATCAGCAGAAACAAACGCCG         |
|                      | R         | TGGCATGTATGAGCTCTTGG         |
| <i>MPO1</i>          | F         | CYATCCTCCGTCGTGAGGCACAG      |
|                      | R         | ACGCTAGAGCTGATGAGGCCGTC      |
| <i>AO1</i>           | F         | ATTCTTGCCAGAGAGATGGC         |
|                      | R         | TTCCATGTTTGGCAACTTCAAGAG     |
| <i>AO2</i>           | F         | GAGATGGATCAGTTACTAGGTAC      |
|                      | R         | CCACAGTTCCATGCTTGGCAACC      |
| <i>QS1.1</i>         | F         | GATTCAGTTTGCAAACCCCAAT       |
|                      | R         | AAGCGGAGCTTGATCGTTG          |
| <i>QS1.2</i>         | F         | GATTCAGTTTGCGAACCCCAAG       |
|                      | R         | GAGCTTGATCGTCCATTATCACG      |
| <i>QPT1</i>          | F         | CAATAGCCACCAAAAATGCAG        |
|                      | R         | AGAGGGCAAGTTGAATAACA         |
| <i>QPT2</i>          | F         | CCACAAAATCATTTCACARCC        |
|                      | R         | TTTTCACCACCAACCTTGGA         |
| <i>ERF189</i>        | F         | GCAGCTTCGACTGCAGCTTCCTC      |
|                      | R         | CTCCTCGGACTCGGAGCACTTC       |
| <i>ERF199</i>        | F         | TTAGCAGCTTCGACTTCGAC         |
|                      | R         | CTCGGAGTACTTTTCATGGG         |
| <i>ERF16</i>         | F         | GGCGGCCATGGGGGACGTTTTTCAG    |
|                      | R         | GATTTTGAAAGCGGCTTGATCGTAC    |
| <i>ERF29</i>         | F         | ATTCGATGTTTAGTATTAGAATCCC    |
|                      | R         | ATTATCATGATCGAACAGTACTAC     |
| <i>ERF115</i>        | F         | CAAGTTTTGGCAGCTTCCCTTCG      |
|                      | R         | GGACTCGGACTTTTCTTCAAGTTG     |
| <i>ERF221</i>        | F         | GAACCTACAAATGTTGCTATAACTG    |
|                      | R         | GACAGAGAGATGTTTACAAGTTTCG    |
| <i>ERF163</i>        | F         | CTTGTAATGAGAAATACATAAAGTAG   |
|                      | R         | TATTAAATTGGATAAAACAGTAGAATAG |
| <i>ERF91</i>         | F         | TACAAGGAGGAAACAAAGAAGAACC    |
|                      | R         | TATCTCCGCCGCAAATTTACCCACG    |
| <i>COP9 sununit7</i> | F         | AAGAAATTGTTATCCATCTACAGC     |
|                      | R         | TTTGCTTTTGGAGTTGGTAAGATCTTC  |
| <i>JRE5L1 ΔC</i>     | F         | CACCATATTTGCACAAAACATGG      |
|                      | R         | TGGCTCCTTATCATTTTCTGACGAAGTC |
| <i>ERF104L1 ΔC</i>   | F         | GGCGGCCATGGGGGACGTTTTTCAC    |
|                      | R         | CGGAGCCAATGCTGCATCCTCAGGAG   |
| <i>ERF168L1 ΔC</i>   | F         | ACCCCGACAGGAGAGGTGCCAGAC     |
|                      | R         | GCGGCTTGATCGTAAGCGTTAC       |
| <i>EF1a</i>          | F         | AAGCCCATGGTTGTTGAGAC         |
|                      | R         | GTCAACGTTCTTGATAACAC         |

**Table S3** *NIC2* -locus *ERF* genes and their homologs in tobacco. Clustering of the genes were schematically shown in **Figure 5**. Unplaced SSs are marked with asterisks. The origin of *ERF221* marked with double asterisk was presumed based

| <u>gene name</u>        | <u>gene no.</u> | <u>mRNA no</u> | <u>SS no.</u> | <u>origin</u> |
|-------------------------|-----------------|----------------|---------------|---------------|
| <u>genes on Chr. 19</u> |                 |                |               |               |
| <i>ERF163</i>           | NA              | NA             | 10805         | T             |
| <i>ERF91L1</i>          | 4016            | 8541           | 10805         | T             |
| <i>ERF104 ΔC</i>        | NA              | NA             | 10805         | T             |
| <i>ERF221</i>           | NA              | NA             | 10805         | T**           |
| <i>ERF115</i>           | NA              | NA             | 10805         | T             |
| <i>ERF168</i>           | NA              | NA             | 10805         | T             |
| <i>ERF17</i>            | NA              | NA             | 10805         | T             |
| <i>ERF179</i>           | NA              | NA             | 10805         | T             |
| <i>ERF17L1</i>          | 4018            | 8543           | 10805         | T             |
| <i>ERF189</i>           | 4020            | 8545           | 10805         | T             |
| <i>ERF17L2 ΔC</i>       | NA              | NA             | 10805         | T             |
| <i>JRE5L1</i>           | NA              | NA             | 15353         | T             |
| <i>ERF104L1 ΔC</i>      | NA              | NA             | 3881*         | T             |
| <i>ERF168L1 ΔC</i>      | 55871           | 119118         | 3881*         | T             |
| <u>genes on Chr. 7</u>  |                 |                |               |               |
| <i>ERF199</i>           | 52368           | 111850         | 3181          | S             |
| <i>ERF17L3 ΔN</i>       | 52369           | 111851         | 3181          | S             |
| <i>ERF210</i>           | ND              | NA             | 3181          | S             |
| <i>ERF130</i>           | ND              | NA             | 3181          | S             |
| <i>ERF16</i>            | 52370           | 111852         | 3181          | S             |
| <i>ERF29</i>            | ND              | NA             | 3181          | S             |
| <i>ERF91L2</i>          | ND              | NA             | 6062*         | S             |
| <i>JRE5L2</i>           | 16863           | 36133          | 134732        | S             |

**Table S4** Primer sequences for genomic PCR analysis to detect the chromosomal delation around *NIC2* locus in the mutants. These primers were used for the experments shown in **Supplemental Figure S5**.

| primer target |                     |             |                            |                            |
|---------------|---------------------|-------------|----------------------------|----------------------------|
| SS name       | position on SS (kb) | primer name | sequence                   |                            |
| 10805         | 179                 | 179F        | GATATAAATCTCAGCCAACCTCTCCG |                            |
|               |                     | 180R        | TCCTTGGTTTGGCAGGGTATTACCG  |                            |
|               | 181                 | 181F        | CCAACTCCCTGGCCATACTGGTCCG  |                            |
|               |                     | 182R        | ATGGGAAGACCGATGATCAGGTACC  |                            |
|               | 193                 | 193F        | TTGTTGTTGCAGCAGTGGAAAATGG  |                            |
|               |                     | 193R2       | TCATACTTAAACATTTGAATGAGGC  |                            |
|               | 196                 | 196F        | GAAACCCTGTTCCCGGAACTGTTGC  |                            |
|               |                     | 197R2       | GTTTCAGTTAAGGTGAAACTCAGTGC |                            |
|               | 200                 | 200F        | GGCATCTGGTAAGAAAATCTAGACC  |                            |
|               |                     | 200R        | GTCCAAGTGAAAGGGGCCATCGC    |                            |
|               | 641                 | 641F        | TTGCTAATTATGTAGACATTTGC    |                            |
|               |                     | 641R        | TTCATGCACATGTTTCTATCAGCTC  |                            |
|               | 646                 | 646F        | CTAAAAATATAACACGAACTCACTCG |                            |
|               |                     | 646R        | TGTGGTCACAAGGACATATATGACG  |                            |
|               | 650                 | 650F        | CGGAAAAGATTGTACATATTTTAGAG |                            |
|               |                     | 650R        | TGCGATCACACCAGCAACCCAGCTGC |                            |
|               | 15353               | 150         | 150F                       | GTGAAGGTCGTTTACGCGAGGTGACG |
|               |                     |             | 150R                       | CTCGCTTTTGTGAGCCAAAATGCG   |
| 170           |                     | 170F        | AGCTCCTCTTCGCGAACGTGATGG   |                            |
|               |                     | 170R        | ACGTCTCACCTGTCGTGATGGTGC   |                            |
| 200           |                     | 200F        | GTGTGGTTCTAGGCTTATCCGC     |                            |
|               |                     | 201R        | TCAGATTTGATTTCTAAAGTTGC    |                            |
| 500           |                     | 500F        | TCTTCCCACAAGAAGGTCACGG     |                            |
|               |                     | 501R        | CCTCTCAACCCGCTTCTAATTGC    |                            |

**Table S5** Genes found to be deleted in LA Burley21. Supporting data are in **Supplemental Fig. S7**. Deletions of genes of which no. are marked with asterisks were assumed based on the results for the other genes on the same SS. The descriptions in the right three columns are based on previous microarray data (Shoji et al., 2010). Relative positions on chromosomes are estimated on nucleotide counts and presented in percentages (%). ND; not defined.

| chr. no. | SS no. | chromosomal position (%) | gene no.                                        | description                                                | EST accession | ranking | signal ratio ( <i>nic1nic2</i> to WT) |
|----------|--------|--------------------------|-------------------------------------------------|------------------------------------------------------------|---------------|---------|---------------------------------------|
| 10       | 438    | 60.9                     | 58364                                           | GroES-like family protein                                  | EH613852      | 19      | 0.084                                 |
| 17       | 15390  | 0.72                     | 24440                                           | alpha/beta-hydrolases superfamily protein                  | DW004070      | 4       | 0.015                                 |
|          |        | 0.81                     | 24438*                                          | C2H2 and C2HC zinc fingers superfamily protein             | DV999683      | 25      | 0.1                                   |
|          | 4711   | 1.91                     | 60293                                           | unknown                                                    | EB443175      | 1       | 0.013                                 |
|          |        | 1.94                     | 602868                                          | adenine nucleotide alpha hydrolases-like superfamily prote | EH618232      | 30      | 0.111                                 |
|          | 17049  | 2.05                     | 33909                                           | alpha/beta-Hydrolases superfamily protein                  | EB445921      | 5       | 0.021                                 |
|          |        | 2.11                     | 33912                                           | Unknown                                                    | TA19154_4097  | 2       | 0.015                                 |
| 2.25     |        | 33908*                   | zinc finger (CCCH type) helicase family protein | DW004917                                                   | 38            | 0.133   |                                       |
| 2.29     |        | 33905*                   | unknown                                         | TA12325_4097                                               | 16            | 0.062   |                                       |
| 19       | 3704   | 92.4                     | 54926                                           | basic region/leucine zipper motif 53                       | FG635137      | 7       | 0.021                                 |
|          |        | 92.4                     | 54927*                                          | secretion-associated RAS super family 2                    | EH618182      | 6       | 0.021                                 |
|          | 1234   | 77.4                     | 12119                                           | light harvesting complex photosystem II subunit 6          | TA12004_4097  | 14      | 0.062                                 |
| ND       | ND     | ND                       | ND                                              | ND                                                         | FG644812      | 10      | 0.028                                 |

**Table S6** Primer sequences for genomic PCR analysis to detect genes deleted in LA Burley21. These primers were used for the experiments shown in **Supplemental Figure S7**.

| gene ID<br>(name/no./accession) | forward or<br>reverse (F or R) | sequence                 |
|---------------------------------|--------------------------------|--------------------------|
| <i>ERF189</i>                   | F                              | GGGCAATGGAAATGAATCTAGC   |
|                                 | R                              | CTTCCTTCCTTTCACATAG      |
| 58364                           | F                              | CTCTGACATCAACGCTTATGAG   |
|                                 | R                              | CTCAACACTTCATAACATCCAC   |
| 24440                           | F                              | CCTTGCCTAATGGAGGAGATAACG |
|                                 | R                              | CCTCTCAAAGGTAGATAAACTCCC |
| 60293                           | F                              | TCTACCACCAAATGCCAAG      |
|                                 | R                              | GCTTTGGGGATAGAGCGGAGC    |
| 33909                           | F                              | GGATTCCAAAAAATGGTGCC     |
|                                 | R                              | CATCCCATTCAGATTTCCC      |
| 33912                           | F                              | GGATTCTTCCTAAAGGGGTGACAG |
|                                 | R                              | AACTTGGGCATTCCACAAAGC    |
| 54926                           | F                              | GCGATTGGGAGAATTGATGAGC   |
|                                 | R                              | GAAACCAAAGCTACATTGTCC    |
| 12119                           | F                              | GCTTGAGAGACTGAAGGTTG     |
|                                 | R                              | CTACCGTATCACTGCCTTTG     |
| FG644812                        | F                              | CTACTGGAGGAGGAAGAGGAAAGG |
|                                 | R                              | TGACCCTGTGCCATAACCATAGAC |
